# Supplementary material for: Identification of a novel lipid metabolism-related gene signature within the tumour immune microenvironment for breast cancer
Source: PubMed Central journal article supplement (PMC9103058; doi:10.1186/s12944-022-01651-9), 2022-05-13

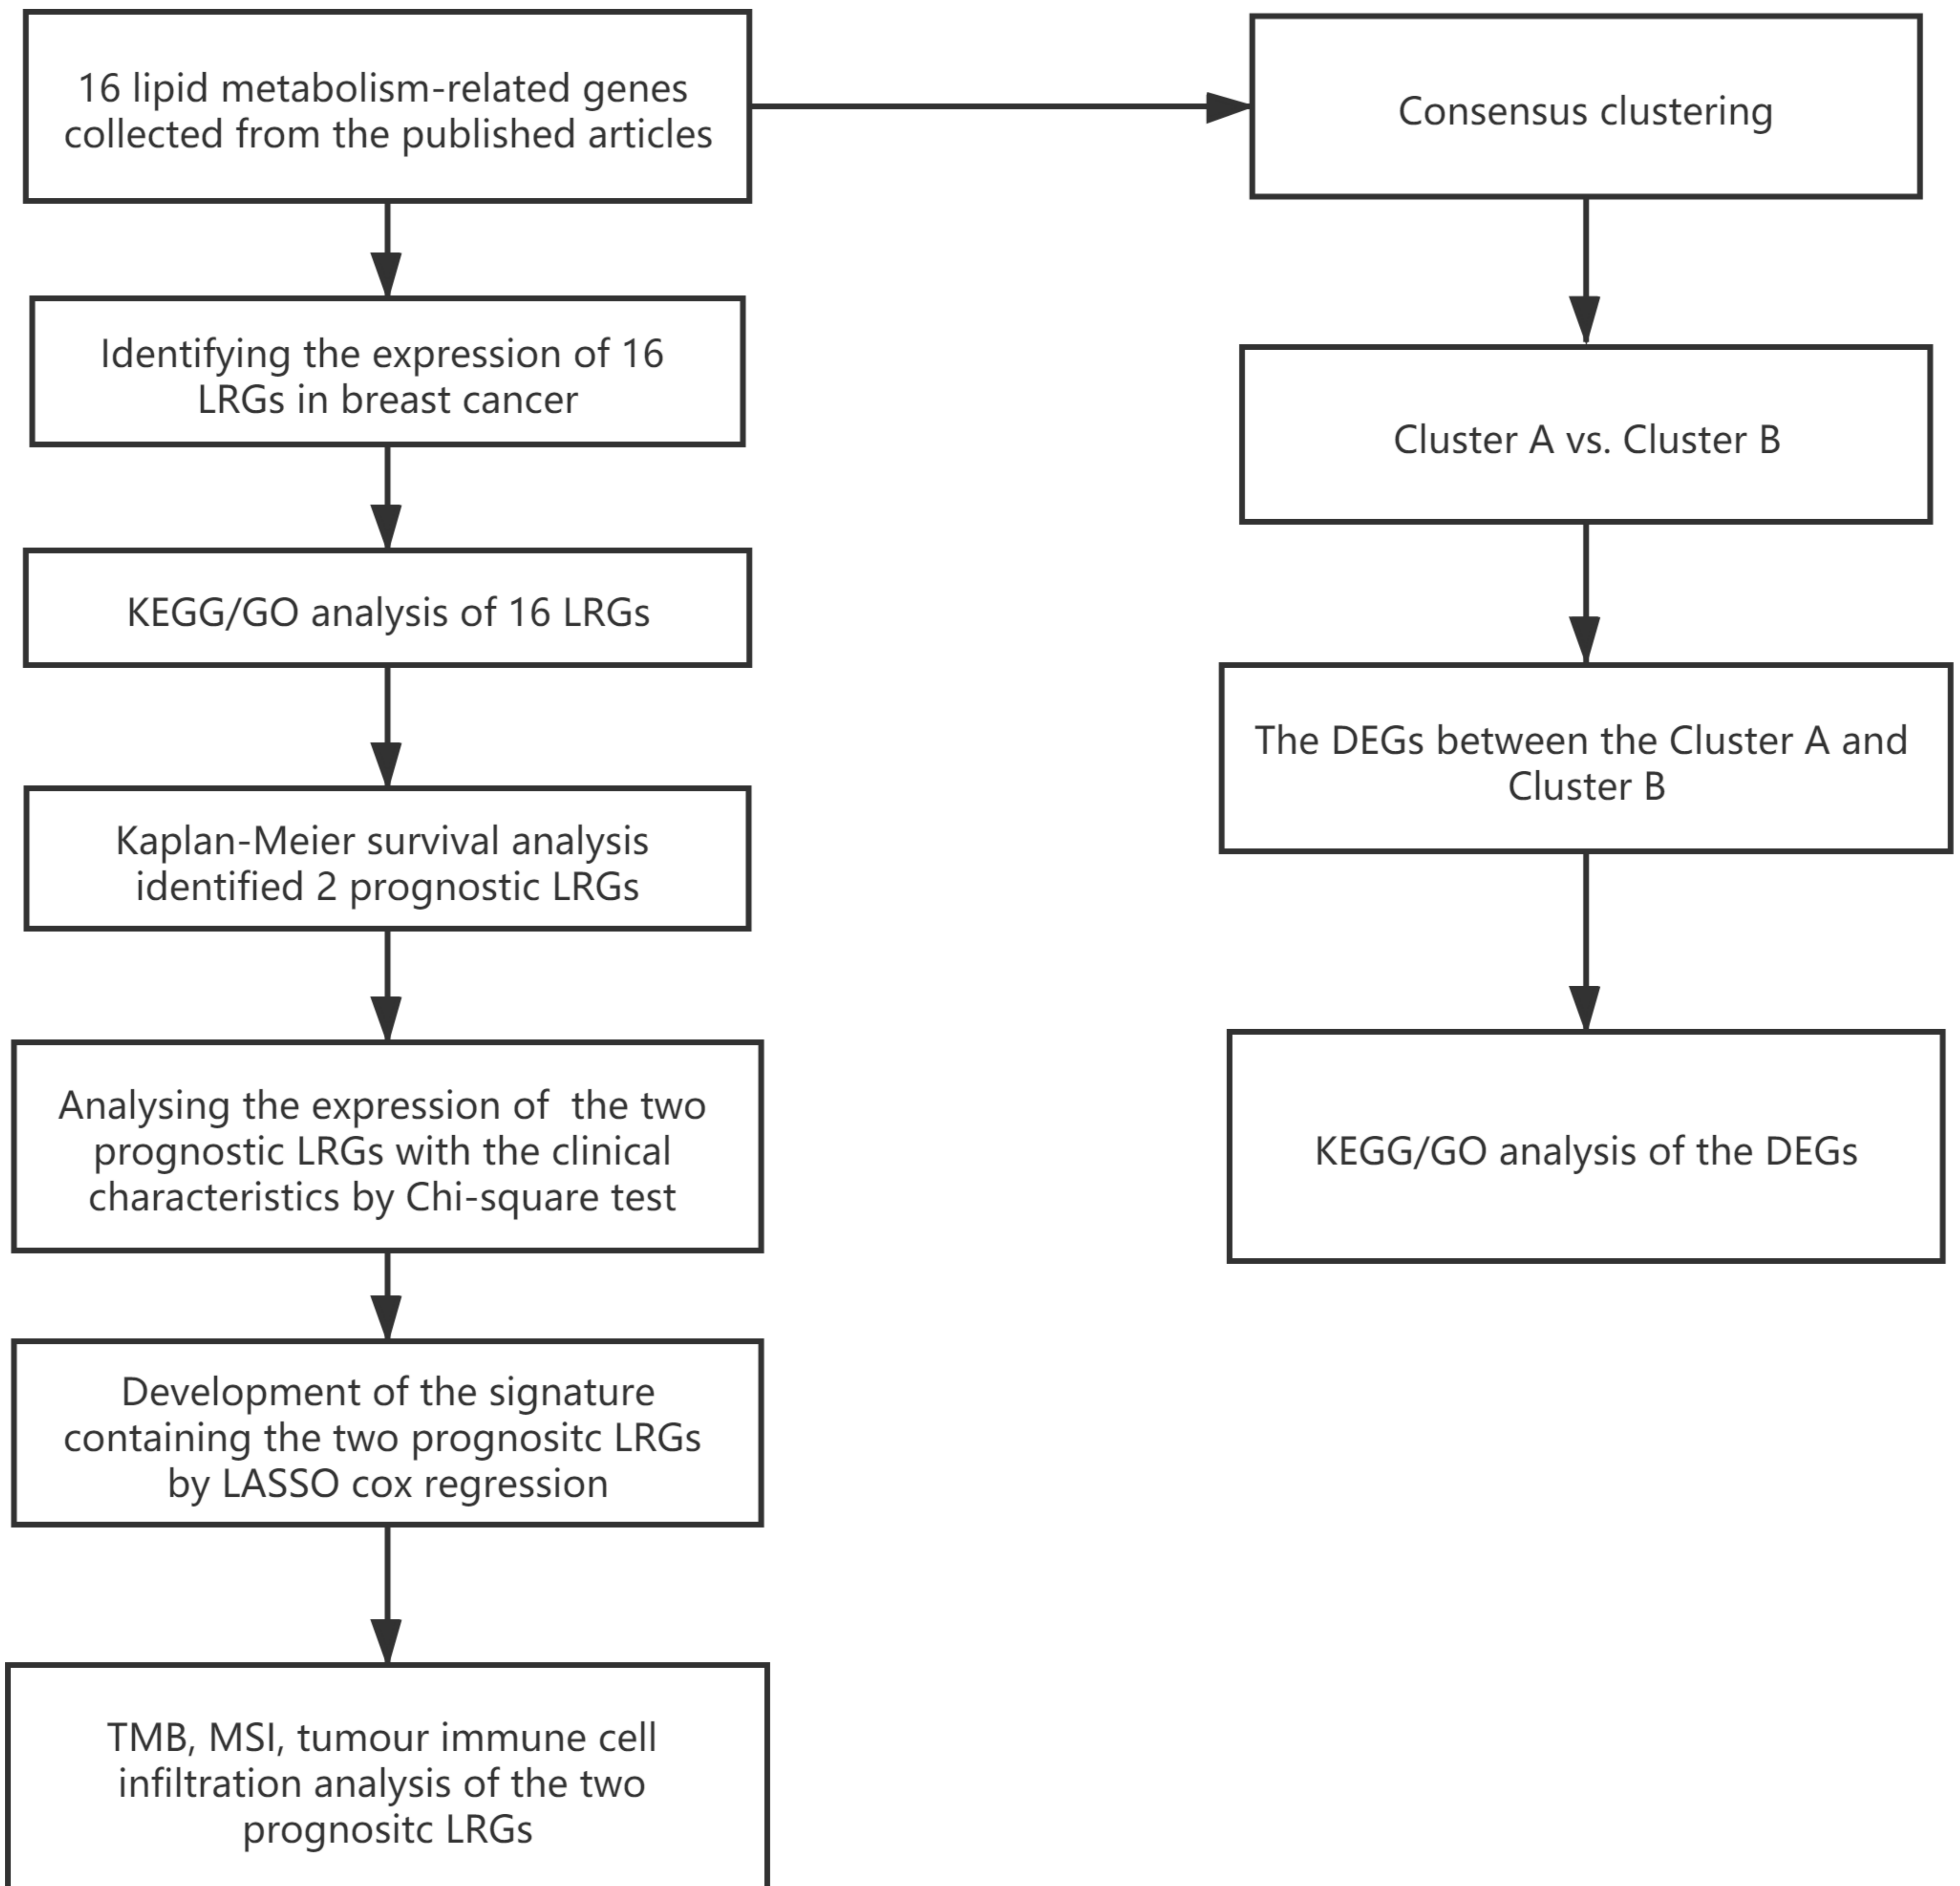

Supplement: 12944_2022_1651_MOESM2_ESM.pdf [file 12944_2022_1651_MOESM2_ESM.pdf]
